# Supplementary material for: Individual and Area-Based Socioeconomic Factors Associated With Dementia Incidence in England: Evidence From a 12-Year Follow-up in the English Longitudinal Study of Ageing
Source: PubMed Central journal article supplement (PMC6145673; doi:10.1001/jamapsychiatry.2018.1012), 2018-05-16
Supplement: jamapsychiatry-e181012-s001.pdf [file jamapsychiatry-e181012-s001.pdf]

## Supplementary Online Content

Cadar D, Lassale C, Davies H, Llewellyn DJ, Batty GD, Steptoe A. Individual and area-based socioeconomic factors associated with dementia incidence in England: evidence from a 12-year follow-up in the English Longitudinal Study of Ageing. *JAMA Psychiatry*. Published online May 16, 2018. doi:10.1001/jamapsychiatry.2018.1012

**eAppendix.** Supplementary materials description.

**eFigure 1.** Flowchart of the individuals included in the competing risk hazard model analyses

**eFigure 2.** Stacked cumulative incidence plots for dementia and death as competing risks within each age cohort

**eTable 1.** Dementia incidence rates per 1000 person-years and 95% confidence intervals (CI), according to baseline characteristics in the overall ELSA sample (N=6220; 463 dementia cases)

**eTable 2.** Hazard Ratios (HR) and 95% confidence intervals (CI) from univariate and multivariate Cox regression models by age

**eTable 3.** Hazard Ratios (HR) and 95% confidence intervals (CI) from univariate and multivariate Fine and Gray Subdistribution Hazards model adjusting for the competing risk of death

This supplementary material has been provided by the authors to give readers additional information about their work.

### **eAppendix. Supplementary materials description.**

There were significant differences between individuals with cardiovascular disease by levels of education,  $\chi^2$  (3), 7.60,  $P \leq .05$ , wealth,  $\chi^2$  (4), 29.00,  $P \leq .001$  and IMD,  $\chi^2$  (4), 26.30,  $P \leq .001$ .

Significant differences were also observed between individuals with diabetes by levels of education,  $\chi^2$  (3), 12.22,  $P \leq .05$ , wealth,  $\chi^2$  (4), 16.74,  $P \leq .002$  and IMD,  $\chi^2$  (4), 38.62,  $P \leq .001$  and those with hypertension by levels of education,  $\chi^2$  (3), 16.74,  $P \leq .001$ , wealth,  $\chi^2$  (4), 22.35,  $P \leq .001$  and IMD,  $\chi^2$  (4), 14.67,  $P \leq .005$ .

Table 1 presents dementia rates by gender and Table 2 presents the results of the sensitivity analysis conducted with the index of multiple deprivation (IMD) categories regrouped into a binary variable. Supplementary analyses were conducted using a modification of the Fine and Gray, Subdistribution Hazards model<sup>31</sup>, described by Chang and colleagues<sup>32</sup>.

In the first stage of these analyses, we constructed a propensity model to estimate the probability of having dementia at the last observed follow-up for each participant, using a logistic regression model in which we included education, wealth, IMD, sex, marital status, stroke, hypertension, diabetes and CVD. Age was not included because we investigated age-cohort effects in these analyses. In this propensity model, those who developed dementia were considered as “events”, while participants who remained alive and not classified with dementia until the end of the study, were considered “non-events”. Each individual (including those who died without developing dementia) was assigned a corresponding propensity score by calculating the estimated probability.

In the second stage, the propensity scores for those who died without developing dementia were used to reclassify them into the main event (dementia or death with a high probability of having dementia) or competing risk event (death with a low probability of having dementia). The threshold used for the reclassification of those who died into high versus the low probability of having had dementia was the median propensity score among those who developed dementia (median=0.11). Individuals who died were reclassified as having had dementia if their propensity score was above the threshold, or as competing event (death with a low probability of dementia) if their propensity score was below the

threshold (see Figure 1 for the flowchart). As a result, in this overall sample of 6220 participants, the number of people classified with dementia or having died with a high probability of dementia was N = 1607 (463 original dementia cases and 1144 individuals who died with a high probability of dementia before they died), while the number of people who died with a low probability of dementia was N=827. The cumulative incidence of dementia and death as competing risks within each age cohort are presented in Figure 2. The results of the association between all SES indicators and dementia incidence, while accounting for the competing risk of death are presented in Table 3.

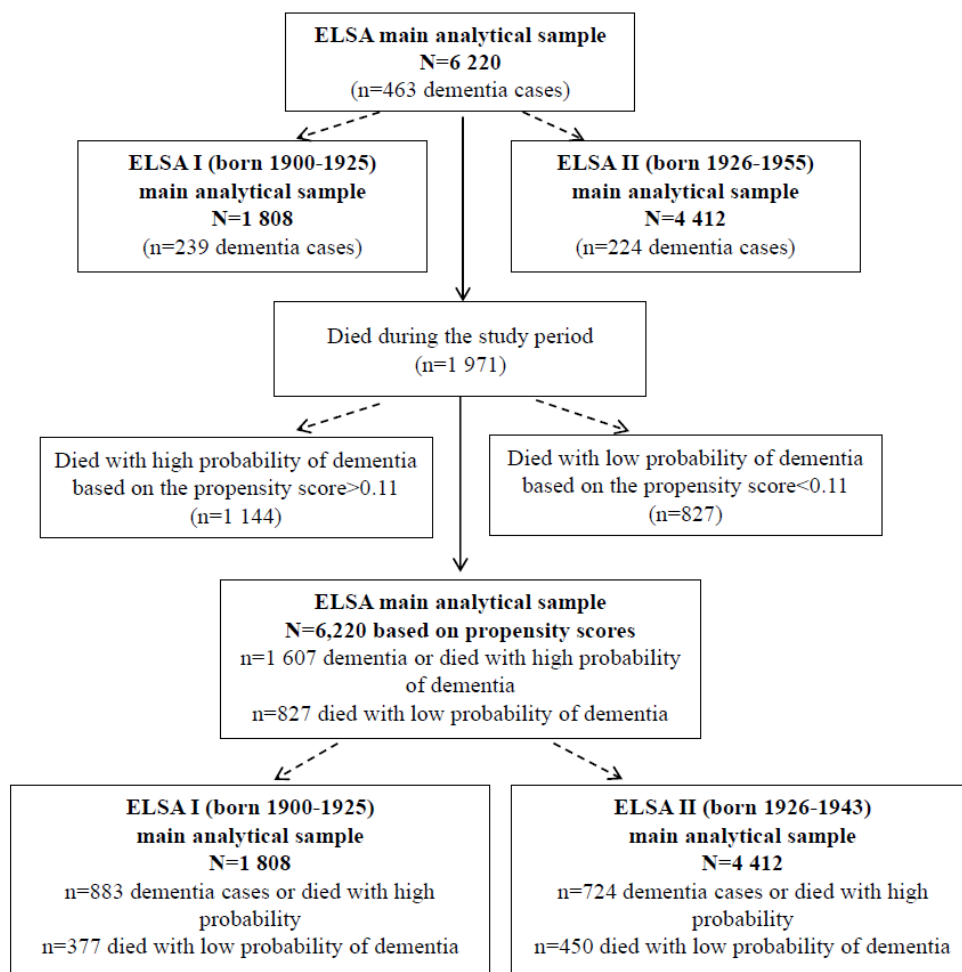

Figure 1. Flowchart of the individuals included in the competing risk hazard model analyses

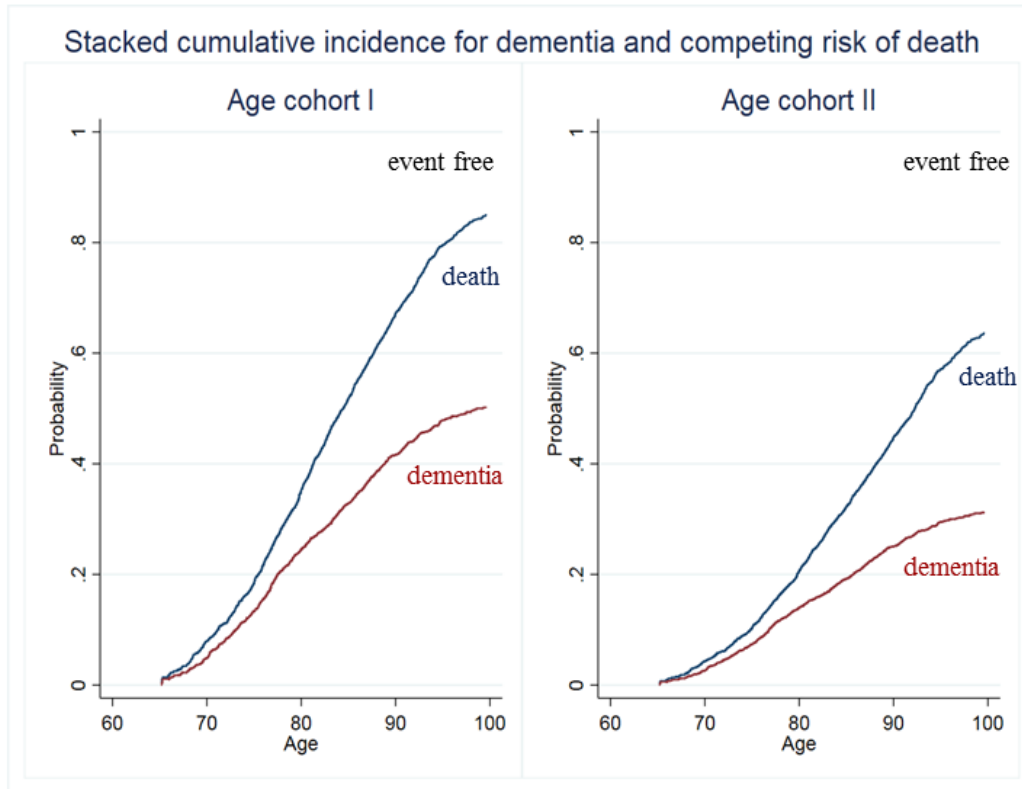

Figure 2. Stacked cumulative incidence plots for dementia and death as competing risks within each age cohort

Table 1. Dementia incidence rates per 1 000 person-years and 95% confidence intervals (CI), according to baseline characteristics in the overall ELSA sample (N=6 220; 463 dementia cases)

|                     | Overall (N=6 220)      |       |             | Men (N=2 810)          |       |             | Women (N=3 410)        |       |             |
|---------------------|------------------------|-------|-------------|------------------------|-------|-------------|------------------------|-------|-------------|
|                     | N (cases/<br>censored) | Rate  | 95% CI      | N (cases/<br>censored) | Rate  | 95% CI      | N (cases/<br>censored) | Rate  | 95% CI      |
| Age continuous      | 463/5757               | 11.32 | 10.34-12.41 | 187/2623               | 10.27 | 8.92-11.89  | 276/3134               | 12.09 | 10.76-13.63 |
| Age-groups          |                        |       |             |                        |       |             |                        |       |             |
| 65-69               | 71/2008                | 4.38  | 3.49-5.57   | 36/948                 | 4.86  | 3.54-6.85   | 35/1060                | 3.97  | 2.88-5.63   |
| 70-74               | 105/1705               | 8.30  | 6.88-10.08  | 48/797                 | 8.50  | 6.46-11.41  | 57/908                 | 8.13  | 6.33-10.63  |
| 75-79               | 127/963                | 17.14 | 14.49-20.41 | 50/459                 | 15.53 | 11.88-20.67 | 77/534                 | 18.24 | 14.74-22.83 |
| 80+                 | 160/1051               | 24.69 | 21.20-28.91 | 53/419                 | 22.85 | 17.64-30.09 | 107/632                | 25.62 | 21.26-31.13 |
| Marital status      |                        |       |             |                        |       |             |                        |       |             |
| Married             | 254/3428               | 9.94  | 8.81-11.26  | 139/1908               | 10.06 | 8.55-11.92  | 115/1520               | 9.81  | 8.21-11.81  |
| Single/divorced     | 209/2329               | 13.35 | 11.68-15.33 | 48/715                 | 10.92 | 8.31-14.63  | 161/1614               | 14.20 | 12.19-16.64 |
| Education           |                        |       |             |                        |       |             |                        |       |             |
| Higher              | 73/976                 | 9.85  | 7.86-12.50  | 30/563                 | 6.58  | 4.64-9.63   | 43/413                 | 13.88 | 10.40-18.94 |
| A level             | 103/1444               | 9.17  | 7.60-11.18  | 45/598                 | 10.21 | 7.69-13.85  | 58/846                 | 8.51  | 6.63-11.10  |
| Below A-level       | 20/316                 | 9.71  | 6.31-15.70  | 17/272                 | 9.50  | 5.98-15.99  | 3/44                   | 10.85 | 3.08-32.32  |
| No qualification    | 267/3021               | 13.08 | 11.62-14.77 | 95/1190                | 12.44 | 10.23-15.27 | 172/1831               | 13.43 | 11.58-15.65 |
| Wealth (quintiles)  |                        |       |             |                        |       |             |                        |       |             |
| Q1 (highest)        | 67/1062                | 7.92  | 6.26-10.16  | 35/546                 | 8.10  | 5.87-11.49  | 32/515                 | 7.74  | 5.52-11.18  |
| Q2                  | 82/1096                | 10.11 | 8.16-12.67  | 31/522                 | 8.01  | 5.68-11.65  | 51/574                 | 11.80 | 9.01-15.75  |
| Q3                  | 91/1154                | 11.03 | 9.02-13.64  | 41/511                 | 11.40 | 8.43-15.76  | 50/643                 | 10.77 | 8.22-14.36  |
| Q4 <sup>th</sup>    | 102/1139               | 12.54 | 10.38-15.28 | 38/513                 | 11.16 | 8.22-15.51  | 64/626                 | 13.50 | 10.65-17.37 |
| Q5 (lowest)         | 121/1306               | 15.05 | 12.62-18.10 | 42/529                 | 13.51 | 10.03-18.63 | 79/776                 | 15.91 | 12.81-19.99 |
| IMD (quintiles)     |                        |       |             |                        |       |             |                        |       |             |
| Q1 (least deprived) | 86/1291                | 8.62  | 7.48-11.24  | 42/574                 | 9.56  | 7.13-11.09  | 44/716                 | 7.90  | 5.93-10.75  |
| Q2                  | 116/1221               | 12.47 | 9.50-14.06  | 52/562                 | 12.08 | 9.26-16.07  | 64/659                 | 12.77 | 10.04-16.47 |
| Q3                  | 97/1224                | 11.56 | 10.20-15.10 | 35/570                 | 9.33  | 6.76-13.25  | 62/654                 | 13.17 | 10.32-17.07 |
| Q4                  | 90/1109                | 11.99 | 9.21-13.88  | 36/501                 | 11.19 | 8.19-15.69  | 54/608                 | 12.58 | 9.73-16.56  |
| Q5 (most deprived)  | 74/913                 | 12.64 | 10.70-16.86 | 22/416                 | 8.77  | 5.84-13.74  | 52/497                 | 15.29 | 11.70-20.33 |
| Stroke              |                        |       |             |                        |       |             |                        |       |             |

|              |          |       |             |          |       |             |          |       |             |
|--------------|----------|-------|-------------|----------|-------|-------------|----------|-------|-------------|
| No           | 407/5170 | 10.87 | 9.87-11.99  | 161/2333 | 9.69  | 8.33-11.35  | 246/2837 | 11.73 | 10.37-13.32 |
| Yes          | 56/587   | 16.47 | 12.78-21.56 | 26/290   | 16.38 | 11.33-24.52 | 30/297   | 16.55 | 11.71-24.11 |
| Hypertension |          |       |             |          |       |             |          |       |             |
| No           | 240/3239 | 11.27 | 9.93-12.85  | 97/1564  | 9.38  | 7.69-11.56  | 143/1675 | 12.81 | 10.88-15.19 |
| Yes          | 223/2518 | 12.44 | 10.86-14.27 | 90/1059  | 12.63 | 10.26-15.73 | 133/1459 | 12.32 | 10.39-14.72 |
| Diabetes     |          |       |             |          |       |             |          |       |             |
| No           | 416/5215 | 11.12 | 10.11-12.26 | 164/2330 | 10.04 | 8.64-11.73  | 252/2885 | 11.90 | 10.53-13.49 |
| Yes          | 47/542   | 13.52 | 10.28-18.13 | 23/293   | 12.42 | 8.38-19.18  | 24/249   | 14.66 | 10.05-22.23 |
| CVD          |          |       |             |          |       |             |          |       |             |
| No           | 373/5081 | 10.17 | 9.15-11.34  | 142/2267 | 9.01  | 7.59-10.75  | 231/2814 | 10.97 | 9.59-12.61  |
| Yes          | 90/676   | 16.21 | 13.67-19.36 | 45/356   | 14.76 | 11.51-19.23 | 45/320   | 17.62 | 13.97-22.50 |

Table 2. Hazard Ratios (HR) and 95% confidence intervals (CI) from univariate and multivariate Cox regression models by age

|                                                                                                                                           | ELSA Overall (N=6 220)<br>43 219 person-years |                 |      |           | Age cohort I (N=1 808)<br>10 484 person-years |                 |      |           | Age cohort II (N=4 412)<br>32 735 person-years |                 |      |           |
|-------------------------------------------------------------------------------------------------------------------------------------------|-----------------------------------------------|-----------------|------|-----------|-----------------------------------------------|-----------------|------|-----------|------------------------------------------------|-----------------|------|-----------|
|                                                                                                                                           | N (cases/<br>censored)                        | Person<br>years | HR   | 95% CI    | N (cases/<br>censored)                        | Person<br>years | HR   | 95% CI    | N (cases/<br>censored)                         | Person<br>years | HR   | 95% CI    |
| <i>Model 1 with SES indicators analysed individually, unadjusted</i>                                                                      |                                               |                 |      |           |                                               |                 |      |           |                                                |                 |      |           |
| <b>IMD</b>                                                                                                                                |                                               |                 |      |           |                                               |                 |      |           |                                                |                 |      |           |
| Q1 (least deprived)                                                                                                                       | 86/1291                                       | 10235           | 1    | -         | 49/333                                        | 2452            | 1    | -         | 37/958                                         | 7,781           | 1    | -         |
| Q2-Q5                                                                                                                                     | 377/4466                                      | 32984           | 1.40 | 1.11-1.77 | 139/908                                       | 8032            | 1.32 | 0.87-2.01 | 187/3229                                       | 24,954          | 1.64 | 1.15-2.34 |
| <i>Model 2 with one SES indicator at the time, adjusted for sex and marital status</i>                                                    |                                               |                 |      |           |                                               |                 |      |           |                                                |                 |      |           |
| <b>IMD</b>                                                                                                                                |                                               |                 |      |           |                                               |                 |      |           |                                                |                 |      |           |
| Q1 (least deprived)                                                                                                                       | 86/1291                                       | 10235           | 1    | -         | 100/661                                       | 2452            | 1    | -         | 37/958                                         | 7,781           | 1    | -         |
| Q2-Q5                                                                                                                                     | 377/4466                                      | 32984           | 1.43 | 1.13-1.81 | 139/908                                       | 8032            | 1.25 | 0.97-1.63 | 187/3229                                       | 24,954          | 1.68 | 1.17-2.40 |
| <i>Model 3 with one SES indicator at the time, adjusted for sex, marital status, stroke, hypertension, diabetes and CVD</i>               |                                               |                 |      |           |                                               |                 |      |           |                                                |                 |      |           |
| <b>IMD</b>                                                                                                                                |                                               |                 |      |           |                                               |                 |      |           |                                                |                 |      |           |
| Q1 (least deprived)                                                                                                                       | 86/1291                                       | 10235           | 1    | -         | 100/661                                       | 2452            | 1    | -         | 37/958                                         |                 | 1    | -         |
| Q2-Q5                                                                                                                                     | 377/4466                                      | 32984           | 1.41 | 1.12-1.79 | 139/908                                       | 8032            | 1.24 | 0.95-1.61 | 187/3229                                       |                 | 1.68 | 1.17-2.41 |
| <i>Model 4 with all 3 SES indicators entered simultaneously, adjusted for sex, marital status, stroke, hypertension, diabetes and CVD</i> |                                               |                 |      |           |                                               |                 |      |           |                                                |                 |      |           |
| <b>IMD</b>                                                                                                                                |                                               |                 |      |           |                                               |                 |      |           |                                                |                 |      |           |
| Q1 (least deprived)                                                                                                                       | 86/1291                                       | 10235           | 1    | -         | 100/661                                       | 2452            | 1    | -         | 37/958                                         | 7,781           | 1    | -         |
| Q2-Q5                                                                                                                                     | 377/4466                                      | 32984           | 1.32 | 1.03-1.69 | 139/908                                       | 8032            | 1.23 | 0.92-1.63 | 187/3229                                       | 24,954          | 1.48 | 1.03-2.14 |



Table 3. Hazard Ratios (HR) and 95% confidence intervals (CI) from univariate and multivariate Fine and Gray Subdistribution Hazards model adjusting for the competing risk of death

|                                                                                        | ELSA Overall (N=6 220)<br>43 219 person-years |      |           | Age cohort I (N=1 808)<br>10 484 person-years |      |           | Age cohort II (N=4 412)<br>32 735 person-years |      |           |
|----------------------------------------------------------------------------------------|-----------------------------------------------|------|-----------|-----------------------------------------------|------|-----------|------------------------------------------------|------|-----------|
|                                                                                        | N<br>(cases/death/<br>censored)               | HR   | 95% CI    | N<br>(cases/death/<br>censored)               | HR   | 95% CI    | N (cases/death/<br>censored)                   | HR   | 95% CI    |
| <b>Model 1 with SES indicators analysed individually, unadjusted</b>                   |                                               |      |           |                                               |      |           |                                                |      |           |
| <b>Education</b>                                                                       |                                               |      |           |                                               |      |           |                                                |      |           |
| University degree                                                                      | 144/182/723                                   | 1    | -         | 72/71/72                                      | 1    | -         | 72/111/651                                     | 1    | -         |
| A level                                                                                | 239/260/1,048                                 | 1.09 | 0.89-1.36 | 115/131/127                                   | 0.89 | 0.66-1.21 | 124/129/921                                    | 1.25 | 0.93-1.67 |
| Below A-level                                                                          | 95/49/192                                     | 1.14 | 1.64-2.80 | 46/19/27                                      | 2.01 | 1.36-2.98 | 49/30/165                                      | 2.27 | 1.56-3.27 |
| No qualification                                                                       | 1129/336/1823                                 | 2.77 | 2.14-3.31 | 650/156/322                                   | 2.42 | 1.87-3.12 | 479/180/1501                                   | 2.83 | 2.21-3.63 |
|                                                                                        | <i>p trend</i> ≤ 0.01                         |      |           | <i>p trend</i> ≤ 0.01                         |      |           | <i>p trend</i> ≤ 0.01                          |      |           |
| <b>Wealth</b>                                                                          |                                               |      |           |                                               |      |           |                                                |      |           |
| Q1 (highest)                                                                           | 113/208/808                                   | 1    | -         | 60/97/89                                      | 1    | -         | 53/111/718                                     | 1    | -         |
| Q2                                                                                     | 173/214/791                                   | 1.59 | 1.25-2.03 | 88/95/83                                      | 1.59 | 1.13-2.23 | 85/119/708                                     | 1.37 | 0.97-1.94 |
| Q3                                                                                     | 292/149/804                                   | 2.73 | 2.19-3.40 | 160/62/116                                    | 2.69 | 1.99-3.66 | 132/87/688                                     | 1.80 | 1.29-2.49 |
| Q4                                                                                     | 403/137/701                                   | 3.78 | 3.06-4.67 | 202/65/99                                     | 3.35 | 2.49-4.52 | 201/72/602                                     | 2.29 | 1.67-3.15 |
| Q5 (lowest)                                                                            | 625/119/683                                   | 5.46 | 4.47-6.71 | 372/58/162                                    | 4.65 | 3.51-6.15 | 253/61/522                                     | 2.69 | 1.94-3.73 |
|                                                                                        | <i>p trend</i> ≤ 0.01                         |      |           | <i>p trend</i> ≤ 0.01                         |      |           | <i>p trend</i> ≤ 0.01                          |      |           |
| <b>IMD</b>                                                                             |                                               |      |           |                                               |      |           |                                                |      |           |
| Q1 (least deprived)                                                                    | 215/254/908                                   | 1    | -         | 122/122/138                                   | 1    | -         | 93/132/770                                     | 1    | -         |
| Q2                                                                                     | 279/209/849                                   | 1.44 | 1.19-1.72 | 159/111/112                                   | 1.47 | 1.15-1.87 | 120/98/737                                     | 1.39 | 1.06-1.82 |
| Q3                                                                                     | 346/178/797                                   | 1.96 | 1.64-2.33 | 211/65/115                                    | 2.20 | 1.74-2.78 | 135/113/682                                    | 1.67 | 1.28-2.18 |
| Q4                                                                                     | 390/120/689                                   | 2.65 | 2.24-3.14 | 208/52/97                                     | 2.56 | 2.04-3.22 | 182/68/592                                     | 2.69 | 2.09-3.45 |
| Q5 (most deprived)                                                                     | 376/66/544                                    | 3.35 | 2.82-3.97 | 183/27/86                                     | 2.98 | 2.37-3.76 | 193/39/458                                     | 3.62 | 2.82-4.65 |
|                                                                                        | <i>p trend</i> ≤ 0.01                         |      |           | <i>p trend</i> ≤ 0.01                         |      |           | <i>p trend</i> ≤ 0.01                          |      |           |
| <b>Model 2 with one SES indicator at the time, adjusted for sex and marital status</b> |                                               |      |           |                                               |      |           |                                                |      |           |
| <b>Education</b>                                                                       |                                               |      |           |                                               |      |           |                                                |      |           |
| University degree                                                                      | 144/182/723                                   | 1    | -         | 72/71/72                                      | 1    | -         | 72/111/651                                     | 1    | -         |

|                                                                                                                             |               |      |                     |             |      |                     |              |      |                     |
|-----------------------------------------------------------------------------------------------------------------------------|---------------|------|---------------------|-------------|------|---------------------|--------------|------|---------------------|
| A level                                                                                                                     | 239/260/1048  | 1.05 | 0.85-1.30           | 115/131/127 | 0.80 | 0.58-1.09           | 124/129/921  | 1.28 | 0.96-1.73           |
| Below A-level                                                                                                               | 95/49/192     | 2.31 | 1.78-2.98           | 46/19/27    | 2.30 | 1.60-3.32           | 49/30/165    | 2.19 | 1.52-3.16           |
| No qualification                                                                                                            | 1129/336/1823 | 2.54 | 2.12-3.04           | 650/156/322 | 2.15 | 1.66-2.79           | 479/180/1501 | 2.75 | 2.13-3.54           |
|                                                                                                                             |               |      | <i>p trend</i> ≤001 |             |      | <i>p trend</i> ≤001 |              |      | <i>p trend</i> ≤001 |
| <b>Wealth</b>                                                                                                               |               |      |                     |             |      |                     |              |      |                     |
| Q1 (highest)                                                                                                                | 113/208/808   | 1    | -                   | 60/97/89    | 1    | -                   | 53/111/718   | 1    | -                   |
| Q2                                                                                                                          | 173/214/791   | 1.46 | 1.14-1.86           | 88/95/83    | 1.41 | 1.00-1.99           | 85/119/708   | 1.54 | 1.09-2.18           |
| Q3                                                                                                                          | 292/149/804   | 2.49 | 2.00-3.10           | 160/62/116  | 2.59 | 1.90-3.52           | 132/87/688   | 2.42 | 1.75-3.33           |
| Q4 <sup>th</sup>                                                                                                            | 403/137/701   | 3.28 | 2.65-4.06           | 202/65/99   | 3.11 | 2.31-4.21           | 201/72/602   | 3.50 | 2.58-4.74           |
| Q5 (lowest)                                                                                                                 | 625/119/683   | 4.05 | 3.29-4.97           | 372/58/162  | 3.63 | 3.73-4.83           | 253/61/522   | 4.74 | 3.50-6.43           |
|                                                                                                                             |               |      | <i>p trend</i> ≤001 |             |      | <i>p trend</i> ≤001 |              |      | <i>p trend</i> ≤001 |
| <b>IMD</b>                                                                                                                  |               |      |                     |             |      |                     |              |      |                     |
| Q1 (least deprived)                                                                                                         | 215/254/908   | 1    | -                   | 122/122/138 | 1    | -                   | 93/132/770   | 1    | -                   |
| Q2                                                                                                                          | 279/209/849   | 1.40 | 1.17-1.68           | 159/111/112 | 1.45 | 1.14-1.85           | 120/98/737   | 1.33 | 1.01-1.74           |
| Q3                                                                                                                          | 346/178/797   | 1.85 | 1.55-2.20           | 211/65/115  | 2.06 | 1.64-2.59           | 135/113/682  | 1.60 | 1.22-2.08           |
| Q4                                                                                                                          | 390/120/689   | 2.43 | 2.06-2.87           | 208/52/97   | 2.43 | 1.95-3.04           | 182/68/592   | 2.39 | 1.87-3.07           |
| Q5 (most deprived)                                                                                                          | 376/66/544    | 2.77 | 2.34-3.28           | 183/27/86   | 2.56 | 2.04-3.21           | 193/39/458   | 2.99 | 2.32-3.85           |
|                                                                                                                             |               |      | <i>p trend</i> ≤001 |             |      | <i>p trend</i> ≤001 |              |      | <i>p trend</i> ≤001 |
| <b>Model 3 with one SES indicator at the time, adjusted for sex, marital status, stroke, hypertension, diabetes and CVD</b> |               |      |                     |             |      |                     |              |      |                     |
| <b>Education</b>                                                                                                            |               |      |                     |             |      |                     |              |      |                     |
| University degree                                                                                                           | 144/182/723   | 1    | -                   | 72/71/72    | 1    | -                   | 72/111/651   | 1    | -                   |
| A level                                                                                                                     | 239/260/1048  | 1.04 | 0.84-1.28           | 115/131/127 | 0.81 | 0.60-1.10           | 124/129/921  | 1.24 | 0.93-1.66           |
| Below A-level                                                                                                               | 95/49/192     | 2.14 | 1.65-2.79           | 46/19/27    | 2.20 | 1.52-3.20           | 49/30/165    | 1.99 | 1.37-2.89           |
| No qualification                                                                                                            | 1129/336/1823 | 2.42 | 2.02-2.90           | 650/156/322 | 2.13 | 1.64-2.75           | 479/180/1501 | 2.54 | 1.97-3.27           |
|                                                                                                                             |               |      | <i>p trend</i> ≤001 |             |      | <i>p trend</i> ≤001 |              |      | <i>p trend</i> ≤001 |
| <b>Wealth</b>                                                                                                               |               |      |                     |             |      |                     |              |      |                     |
| Q1 (highest)                                                                                                                | 113/208/808   | 1    | -                   | 60/97/89    | 1    | -                   | 53/111/718   | 1    | -                   |
| Q2                                                                                                                          | 173/214/791   | 1.44 | 1.13-1.82           | 88/95/83    | 1.40 | 1.00-1.96           | 85/119/708   | 1.51 | 1.07-2.13           |
| Q3                                                                                                                          | 292/149/804   | 2.35 | 1.88-2.92           | 160/62/116  | 2.47 | 1.83-3.35           | 132/87/688   | 2.26 | 1.64-3.11           |
| Q4 <sup>th</sup>                                                                                                            | 403/137/701   | 3.11 | 2.52-3.84           | 202/65/99   | 2.97 | 2.21-4.01           | 201/72/602   | 3.26 | 2.41-4.41           |
| Q5 (lowest)                                                                                                                 | 625/119/683   | 3.76 | 3.07-4.62           | 372/58/162  | 3.52 | 2.66-4.66           | 253/61/522   | 4.09 | 3.02-5.56           |
|                                                                                                                             |               |      | <i>p trend</i> ≤001 |             |      | <i>p trend</i> ≤001 |              |      | <i>p trend</i> ≤001 |

|                                                                                                                                           |                       |      |           |                       |      |           |                       |      |           |
|-------------------------------------------------------------------------------------------------------------------------------------------|-----------------------|------|-----------|-----------------------|------|-----------|-----------------------|------|-----------|
| <b>IMD</b>                                                                                                                                |                       |      |           |                       |      |           |                       |      |           |
| Q1 (least deprived)                                                                                                                       | 215/254/908           | 1    | -         | 122/122/138           | 1    | -         | 93/132/770            | 1    | -         |
| Q2                                                                                                                                        | 279/209/849           | 1.42 | 1.18-1.70 | 159/111/112           | 1.46 | 1.15-1.85 | 120/98/737            | 1.37 | 1.05-1.81 |
| Q3                                                                                                                                        | 346/178/797           | 1.85 | 1.54-1.18 | 211/65/115            | 2.04 | 1.63-2.56 | 135/113/682           | 1.61 | 1.24-2.11 |
| Q4                                                                                                                                        | 390/120/689           | 2.28 | 1.93-2.70 | 208/52/97             | 2.32 | 1.85-2.89 | 182/68/592            | 2.27 | 1.77-2.92 |
| Q5 (most deprived)                                                                                                                        | 376/66/544            | 2.63 | 2.22-3.11 | 183/27/86             | 2.48 | 1.97-3.11 | 193/39/458            | 2.78 | 2.16-3.60 |
|                                                                                                                                           | <i>p trend</i> ≤ .001 |      |           | <i>p trend</i> ≤ .001 |      |           | <i>p trend</i> ≤ .001 |      |           |
| <b>Model 4 with all 3 SES indicators entered simultaneously, adjusted for sex, marital status, stroke, hypertension, diabetes and CVD</b> |                       |      |           |                       |      |           |                       |      |           |
| <b>Education</b>                                                                                                                          |                       |      |           |                       |      |           |                       |      |           |
| University degree                                                                                                                         | 144/182/723           | 1    | -         | 72/71/72              | 1    | -         | 72/111/651            | 1    | -         |
| A level                                                                                                                                   | 239/260/1048          | 0.88 | 0.71-1.09 | 115/131/127           | 0.73 | 0.54-0.99 | 124/129/921           | 1.00 | 0.74-1.35 |
| Below A-level                                                                                                                             | 95/49/192             | 1.51 | 1.15-1.99 | 46/19/27              | 1.56 | 1.06-2.30 | 49/30/165             | 1.38 | 0.94-2.05 |
| No qualification                                                                                                                          | 1129/336/182<br>3     | 1.65 | 1.37-1.99 | 650/156/322           | 1.53 | 1.17-1.99 | 479/180/1501          | 1.65 | 1.26-2.16 |
|                                                                                                                                           | <i>p trend</i> ≤ .001 |      |           | <i>p trend</i> ≤ .001 |      |           | <i>p trend</i> ≤ .001 |      |           |
| <b>Wealth</b>                                                                                                                             |                       |      |           |                       |      |           |                       |      |           |
| Q1 (highest)                                                                                                                              | 113/208/808           | 1    | -         | 60/97/89              | 1    | -         | 53/111/718            | 1    | -         |
| Q2                                                                                                                                        | 173/214/791           | 1.33 | 1.06-1.68 | 88/95/83              | 1.31 | 0.95-1.81 | 85/119/708            | 1.39 | 0.98-1.96 |
| Q3                                                                                                                                        | 292/149/804           | 1.87 | 1.50-2.34 | 160/62/116            | 1.93 | 1.43-2.62 | 132/87/688            | 1.83 | 1.31-2.54 |
| Q4 <sup>th</sup>                                                                                                                          | 403/137/701           | 2.24 | 1.81-2.77 | 202/65/99             | 2.15 | 1.60-2.89 | 201/72/602            | 2.33 | 1.69-3.20 |
| Q5 (lowest)                                                                                                                               | 625/119/683           | 2.52 | 2.03-3.12 | 372/58/162            | 2.35 | 1.76-3.13 | 253/61/522            | 2.74 | 1.97-3.81 |
|                                                                                                                                           | <i>p trend</i> ≤ .001 |      |           | <i>p trend</i> ≤ .001 |      |           | <i>p trend</i> ≤ .001 |      |           |
| <b>IMD</b>                                                                                                                                |                       |      |           |                       |      |           |                       |      |           |
| Q1 (least deprived)                                                                                                                       | 215/254/908           | 1    | -         | 122/122/138           | 1    | -         | 92/133/770            | 1    | -         |
| Q2                                                                                                                                        | 279/209/849           | 1.23 | 1.03-1.46 | 159/111/112           | 1.24 | 0.98-1.57 | 102/116/737           | 1.22 | 0.93-1.61 |
| Q3                                                                                                                                        | 346/178/797           | 1.40 | 1.17-1.66 | 211/65/115            | 1.51 | 1.20-1.89 | 99/149/682            | 1.30 | 1.00-1.97 |
| Q4                                                                                                                                        | 390/120/689           | 1.53 | 1.29-1.82 | 208/52/97             | 1.55 | 1.23-1.96 | 124/126/592           | 1.56 | 1.20-2.02 |
| Q5 (most deprived)                                                                                                                        | 376/66/544            | 1.54 | 1.29-1.85 | 183/27/86             | 1.49 | 1.17-1.91 | 128/104/458           | 1.63 | 1.23-2.14 |
|                                                                                                                                           | <i>p trend</i> ≤ .001 |      |           | <i>p trend</i> ≤ .001 |      |           | <i>p trend</i> ≤ .001 |      |           |
